# Supplementary material
Source: Royal Society of Chemistry journal article supplement (doi:10.1039/b102988f), 2001-10-01
Supplement: b102988f.doc [file b102988f.doc]

**ESI for JMC b102988f**

**1-Decyloxy-2,3,4-trifluorobenzene** (**4b**)

Quantities: compound **3** (2.50 g, 0.017 mol), 1-bromodecane (3.54 g, 0.016 mol), and sodium hydride (0.60 g, 0.020 mol, 80% in oil). The experimental procedure was as described for the preparation of compound **4a**.

Yield 4.55 g (98%); H (270 MHz; CDCl3) 0.88 (3H, t), 1.31 (12H, m), 1.41 (2H, quint), 1.80 (2H, quint), 4.00 (2H, t), 6.63 (1H, m), 6.85 (1H, m); IR max(KBr)/cm–1 2930, 2860, 1630, 1510, 1265, 1085, and 1020 cm–1; MS *m/z* 288(M+).

**5-Decyloxy-2,3,4-trifluorophenylboronic acid** (**5b**)

Quantities: compound **4b** (4.55 g, 0.016 mol), n-butyllithium (6.40 cm3, 0.016 mol, 2.5 mol dm3 in hexanes), and trimethyl borate (3.33 g, 0.032 mol). The experimental procedure was as described for the preparation of compound **5a**.

Yield 5.15 g (100%); H (270 MHz; CDCl3) 0.88 (3H, t), 1.31 (12H, m), 1.42 (2H, quint), 1.80 (2H, quint), 4.00 (2H, t), 6.78 (1H, ddd), no OH absorption observed; IR max(KBr)/cm–1 3500-3100, 2950, 2855, 1520, 1465, 1380, 1120, 1085, 1020, 880, 800, 705; MS *m/z* 332 (M+).

**1,2,3-Trifluoro-4-heptylbenzene** (**8b**)

Quantities: compound **1** (5.00 g, 0.038 mol), n-butyllithium (18.0 cm3, 0.045 mol, 2.5 mol dm3 in hexanes), and pentanal (3.30 g, 0.038 mol). The experimental procedure was as described for the preparation of compound **8a**.

Yield 6.75 g (88%); H (270 MHz; CDCl3) 0.90 (3H, t), 1.32 (8H, m), 1.58 (2H, quint), 2.61 (2H, t), 6.85 (2H, m), IR max(KBr)/cm–1 2940, 2860, 1510, 1480, 1305, 1035, 810; MS *m/z* 230 (M+).

**2,3,4-Trifluoro-5-heptylphenylboronic acid** (**9b**)

Quantities:compound **8b** (4.00 g, 0.017 mol), n-butyllithium (7.80 cm3, 0.020 mol, 2.5 mol dm3 in hexanes), and trimethyl borate (3.55 g, 0.034 mol). The experimental procedure was as described for the preparation of compound **5a**.

Yield 4.32 g (93%); H (270 MHz; CDCl3) 0.89 (3H, t), 1.32 (8H, m), 1.59 (2H, quint), 2.61 (2H, t), 4.45 (2H, br s), 7.38 (1H, ddd); IR max(KBr)/cm–1 3500-3100, 2940, 2870, 1620, 1470, 1355, 1220, 1080, 1040, 990, 900, 800, 750, 695, 625; MS *m/z* 274 (M+).

**1-Benzyloxy-5-decyloxy-2,3,4-trifluorobenzene** (**14b**)

Quantities: compound **13** (3.00 g, 0.012 mol), 1-bromodecane (2.61 g, 0.012 mol), and potassium carbonate (3.26 g, 0.024 mol). The experimental procedure was as described for the preparation of compound **14a**.

Yield 4.09 g (88%); H (270 MHz; CDCl3) 0.89 (3H, t), 1.29 (14H, m), 1.72 (2H, quint), 4.00 (2H, t) 5.10 (2H, s), 7.37 (1H, ddd), 7.39 (5H, m); IR max(KBr)/cm–1 2920, 2860, 1735, 1620, 1525, 1500, 1460, 1400, 1380, 1255, 1100, 1020, 950, 805, 750 and 700; MS *m/z* 394 (M+).

**5-Decyloxy-2,3,4-trifluorophenol** (**15b**)

Quantities: compound **14b** (4.09 g, 0.010 mol) and palladium-on charcoal (0.40 g, 10%). The experimental procedure was as described for the preparation of compound **15a**.

Yield 3.19 g (100%); H (270 MHz; CDCl3) 0.88 (3H, t), 1.21 (14H, m), 1.75 (2H, quint), 4.00 (2H, t) 5.60 (1H, br s), 6.45 (1H, ddd); IR max(KBr)/cm–1 3500-3100, 2920, 2860, 1720, 1630, 1515, 1480, 1405, 1375, 1270, 1150, 1090, 990, 950, 825, 710, 560; MS *m/z* 304 (M+).

**4-Decyloxy-2,3-difluorobiphenyl-4-carboxylic acid** (**21b**)

Quantities: compound **28** (3.46 g, 10.0 mmol), n-butyllithium (4.00 cm3, 10.0 mmol, 2.5 mol dm3 in hexanes), and solid carbon dioxide (excess). The experimental procedure was as described for the preparation of compound **29**.

Yield 3.86 g (99%); H (270 MHz; CDCl3) 0.88 (3H, t), 1.33 (14H, m), 1.70 (2H, quint), 4.00 (2H, t), 6.97 (2H, d), 7.30 (1H, ddd), 7.55 (2H, d), 7.82 (1H, ddd); IR max(KBr)/cm–1 3500-3100 broad, 2930,2850, 2535, 1690, 1605, 1455, 1425, 1300, 1175, 1120, 945, 860, 820, 770, 710, 550, 490; MS *m/z* 390 (M+).

**Decyl 5-benzyloxy-2,3,4-trifluorobenzoate** (**29**)

Quantities: compound **23** (0.564 g, 2.00 mmol), compound **24** (0.316 g, 2.00 mmol), DCC (0.41 g, 2.00 mmol), and DMAP (0.02 g, 0.20 mmol). The experimental procedure was as described for the preparation of compound **17a**.

Yield 0.83 g (99%); H (270 MHz; CDCl3) 0.88 (3H, t), 1.27 (14H, m), 1.57 (2H, quint), 4.32 (2H t), 5.15 (2H, s), 7.36 (6H, m); IR max(KBr)/cm–1 2935, 2861, 2123, 1725, 1628, 1520, 1490, 1455, 1361, 1298, 1223, 1121, 1052, 779; MS *m/z* 422 (M+).

**1-Butylpentyl 5-benzyloxy-2,3,4-trifluorobenzoate** (**30**)

Quantities: compound **23** (0.564 g, 2.00 mmol), compound **25** (0.290 g, 2.00 mmol), DCC (0.41 g, 2.00 mmol), and DMAP (0.02 g, 0.20 mmol). The experimental procedure was as described for the preparation of compound **17a**.

Yield 0.78 g (96%); H (270 MHz; CDCl3) 0.90 (6H, 2xt), 1.32 (8H, m), 1.66 (4H, q), 5.12 (1H, quint), 5.15 (2H, s), 7.40 (6H, m); IR max(KBr)/cm–1 2938, 2867, 2122, 1719, 1632, 1519, 1489, 1372, 1297, 1223 1120, 1053, 967, 928, 779, 740, 699; MS *m/z* 408 (M+).

**(*S*)-1-Methylheptyl 5-benzyloxy-2,3,4-trifluorobenzoate** (**31**)

Quantities: compound **23** (0.35 g, 1.25 mmol), compound **26** (0.16 g, 1.25 mmol), DCC (0.26 g, 1.25 mmol), and DMAP (0.015 g, 0.125 mmol). The experimental procedure was as described for the preparation of compound **17a**.

Yield 0.43 g (88%); H (270 MHz; CDCl3) 0.86 (3H, t), 0.91 (3H, d), 1.31 (8H, m), 1.55 (2H, m), 5.09 (1H sext), 5.14 (2H, s), 7.38 (6H, m); IR max(KBr)/cm–1 2935, 2860, 1725, 1490, 1450, 1365, 1300, 1240, 1125, 1050, 950, 895; MS *m/z* 394 (M+).

**(*S*)-1-Methylheptyl 4-(5-benzyloxy-2,3,4-trifluorophenylcarbonyloxy)benzoate** (**33**)

Quantities: compound **23** (028 g, 1.00 mmol), compound **28** (0.25 g, 1.00 mmol), DCC (0.21 g, 1.00 mmol), and DMAP (0.012 g, 0.10 mmol). The experimental procedure was as described for the preparation of compound **23**.

Yield 0.49 g (98%); H (270 MHz; CDCl3) 0.87 (3H, t), 0.90 (3H, d), 1.31 (8H, m), 1.56 (2H, m), 5.17 (1H sext), 5.27 (2H, s), 6.89 (1H, ddd), 7.28 (2H, d), 7.41 (5H, m), 8.11 (2H, d); IR max(KBr)/cm–1 2935, 2860, 1745, 1720, 1630, 1515, 1475, 1415, 1320, 1280, 1205, 1170, 1140, 1110, 1065, 920, 765, 730; MS *m/z* 514 (M+).

**Decyl 2,3,4-trifluoro-5-hydroxybenzoate** (**34**)

Quantities: compound **29** (0.83 g, 1.97 mmol) and 10% palladium on charcoal (0.10 g). The experimental procedure was as described for the preparation of compound **15a**.

Yield 0.65 g (100%); H (270 MHz; CDCl3) 0.88 (3H, t), 1.27 (14H, m), 1.85 (2H, quint), 4.26 (2H t), 5.00 (1H, broad s), 7.35 (1H, ddd); IR max(KBr)/cm–1 3500-3100, 2935, 2861, 1708, 1495, 1469, 1365, 1258, 1224, 1194, 1110, 1033, 976, 780, 691; MS *m/z* 332 (M+).

**1-Butylpentyl 2,3,4-trifluoro-5-hydroxybenzoate** (**35**)

Quantities: compound **30** (0.78 g, 1.91 mmol) and 10% palladium on charcoal (0.10 g). The experimental procedure was as described for the preparation of compound **15a**.

Yield 0.61 g (100%); H (270 MHz; CDCl3) 0.90 (6H, t), 1.32 (8H, m), 1.63 (4H, q), 5.00 (1H quint), 5.10 (1H, broad s), 7.32 (1H, ddd); IR max(KBr)/cm–1 3500-3100, 2940, 2869, 1709, 1625, 1483, 1383, 1278, 1104, 1035, 966, 778; MS *m/z* 318 (M+).

**(*S*)-1-Methylheptyl 2,3,4-trifluoro-5-hydroxybenzoate** (**36**)

Quantities: compound **31** (0.43 g, 1.10 mmol) and 10% palladium on charcoal (0.10 g). The experimental procedure was as described for the preparation of compound **15a**.

Yield 0.33 g (100%); H (270 MHz; CDCl3) 0.89 (3H, t), 0.91 (3H, d), 1.31 (8H, m), 1.54 (2H, m), 5.10 (1H sext), 5.20 (1H, broad s), 7.39 (1H, ddd); IR max(KBr)/cm–1 3500-3100, 2930, 2800, 1660, 1530, 1420, 1345, 1060, 1020; MS *m/z* 304 (M+).

**(*S*)-1-Methylheptyl 4-(2,3,4-trifluoro-5-hydroxyphenylcarbonyloxy)benzoate** (**38**)

Quantities: compound **33** (0.49 g, 0.95 mmol) and 10% palladium on charcoal (0.10 g). The experimental procedure was as described for the preparation of compound **15a**.

Yield 0.49 g (98%); H (270 MHz; CDCl3) 0.88 (3H, t), (3H, d), 1.31 (8H, m), 1.61 (2H, m), 5.12 (1H sext), 5.27 (1H, broad s), 6.92 (1H, ddd), 7.30 (2H, d), 8.11 (2H, d); IR max(KBr)/cm–1 3500-3100, 2930, 2860, 1710, 1630, 1310, 1300, 1280, 1210, 1110, 940, 765; MS *m/z* 424 (M+).
